# Supplementary material for: The Cost-Effectiveness of Psychosocial Interventions Following Self-Harm in Australia
Source: Atypon-hosted journal article supplement (doi:10.1027/0227-5910/a000926), 2023-10-31
Supplement: 0227-5910_a000926_esm1.pdf [file 0227-5910_a000926_esm1.pdf]

# Electronic Supplementary Material 1

For The Cost-Effectiveness of Psychosocial Interventions Following Self-Harm in Australia by Krysinska et al.

<https://doi.org/10.1027/0227-5910/a000926>

Figure E1. *CBT Intervention Pathway and Schematic model*

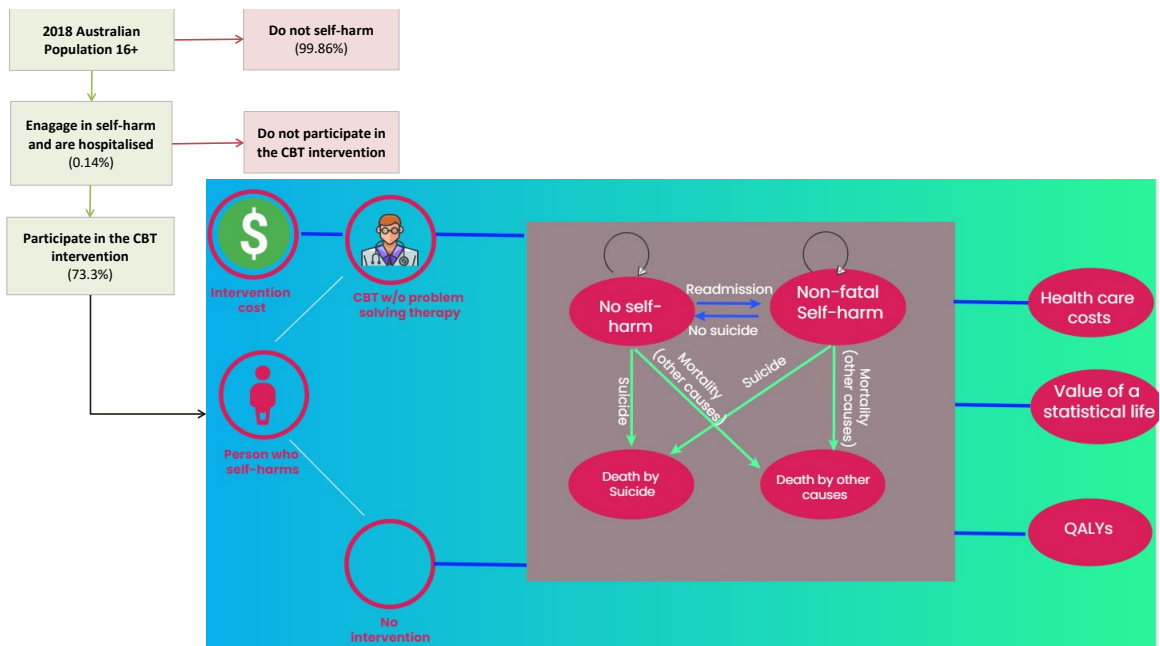

Table E1.

*Input Parameters and Uncertainty Ranges for Health Benefit and Costing*

| Parameter                                                         | Value and uncertainty range                                                                                                                                                                                                                                                                                                                                                                                                                                                                               | Uncertainty distribution | Source(s)                                                                             |
|-------------------------------------------------------------------|-----------------------------------------------------------------------------------------------------------------------------------------------------------------------------------------------------------------------------------------------------------------------------------------------------------------------------------------------------------------------------------------------------------------------------------------------------------------------------------------------------------|--------------------------|---------------------------------------------------------------------------------------|
| <b>Input parameters and uncertainty ranges for health benefit</b> |                                                                                                                                                                                                                                                                                                                                                                                                                                                                                                           |                          |                                                                                       |
| <b>Risk ratio for the CBT (by follow-up period)</b>               | 6-month follow up: 0.54 (95% CI: 0.34 – 0.85)<br>12-month follow up: 0.80 (95% CI: 0.65 – 0.98)                                                                                                                                                                                                                                                                                                                                                                                                           | Lognormal                | A systematic review and meta-analysis (Hawton et al., 2016)                           |
| <b>2018 Australian population</b>                                 | 15-24 years: M 1,655,870; F 1,575,033<br>25-34 years: M 1,862,605; F 1,877,533<br>35-44 years: M 1,651,132; F 1,665,139<br>45-54 years: M 1,567,888; F 1,631,171<br>55-64 years: M 1,411,373; F 1,477,355<br>65-74 years: M 1,090,144; F 1,135,021<br>75-84 years: M 552,254; F 633,917<br>85+ years: M 191,285; F 312,400<br>Total: M 9,982,551; F 10,307,569                                                                                                                                            | N/A                      | ABS Estimated Resident Population (ABS, 2017a)                                        |
| <b>Intentional self-harm rates (Hospitalisation)</b>              | 15-19 years: M 0.17%; F 0.60%<br>20-24 years: M 0.16%; F 0.33%<br>25-29 years: M 0.14%; F 0.21%<br>30-34 years: M 0.12%; F 0.17%<br>35-39 years: M 0.13%; F 0.17%<br>40-44 years: M 0.12%; F 0.17%<br>45-49 years: M 0.12%; F 0.17%<br>50-54 years: M 0.09%; F 0.15%<br>55-59 years: M 0.08%; F 0.09%<br>60-64 years: M 0.05%; F 0.07%<br>65-69 years: M 0.04%; F 0.05%<br>70-74 years: M 0.03%; F 0.04%<br>75-79 years: M 0.03%; F 0.04%<br>80-84 years: M 0.04%; F 0.04%<br>85+ years: M 0.06%; F 0.03% | N/A                      | AIHW (2020) – Suicide and Self-harm monitoring – National Hospital Morbidity Database |
| <b>Incidence of non-fatal repeated self-harm</b>                  | Per year: 13.7% (95% CI: 12.3 to 15.3)                                                                                                                                                                                                                                                                                                                                                                                                                                                                    | N/A                      | Carroll et al. (2014)                                                                 |
| <b>Incidence of fatal repeated self-harm</b>                      | 1 year M: 2.7% (95%CI: 1.8 to 4.0)<br>F: 1.2% (95% CI: 0.7 to 1.9)<br>2 years: 2.1% (95% CI: 1.6 to 2.8)<br>5 years: 3.9% (95% CI: 3.2 to 4.8)<br>10 years: 4.2% (95% CI: 3.1 to 5.6)                                                                                                                                                                                                                                                                                                                     | N/A                      | Carroll et al. (2014)                                                                 |
| <b>Other cause mortality</b>                                      | 15-19 years: M 0.04%; F 0.02%<br>20-24 years: M 0.06%; F 0.02%<br>25-29 years: M 0.06%; F 0.02%<br>30-34 years: M 0.08%; F 0.03%<br>35-39 years: M 0.11%; F 0.06%<br>40-44 years: M 0.14%; F 0.09%<br>45-49 years: M 0.22%; F 0.13%<br>50-54 years: M 0.32%; F 0.20%<br>55-59 years: M 0.49%; F 0.30%<br>60-64 years: M 0.75%; F 0.45%<br>65-69 years: M 1.12%; F 0.67%<br>70-74 years: M 1.80%; F 1.13%<br>75-79 years: M 3.07%; F 2.04%<br>80-84 years: M 5.64%; F 3.88%<br>85+ years: M 13.6%; F 11.7% | N/A                      | ABS (2017b)                                                                           |
| <b>Utility weight for non-fatal self-harm</b>                     | 0.54 (95% CI: 0.29 to 0.60)                                                                                                                                                                                                                                                                                                                                                                                                                                                                               | Beta                     | van Spijker et al. (2011)                                                             |
| <b>Utility weight for non-self-harm</b>                           | 0.64 (95% CI: 0.33 to 0.95)                                                                                                                                                                                                                                                                                                                                                                                                                                                                               | Beta                     | van Spijker et al. (2011)                                                             |

| <b>Input parameters and uncertainty ranges for costing analysis</b>             |                                                                                                                                                                                                                                                                                                                                                                                                                                                                                                                                                                                               |           |                                                                                                                                        |
|---------------------------------------------------------------------------------|-----------------------------------------------------------------------------------------------------------------------------------------------------------------------------------------------------------------------------------------------------------------------------------------------------------------------------------------------------------------------------------------------------------------------------------------------------------------------------------------------------------------------------------------------------------------------------------------------|-----------|----------------------------------------------------------------------------------------------------------------------------------------|
| <b>Number of CBT sessions</b>                                                   | Mean: 7.25<br>Standard deviation (SD) 2.49                                                                                                                                                                                                                                                                                                                                                                                                                                                                                                                                                    | Lognormal | Individual studies from the meta-analysis published by Hawton et al. (2016)                                                            |
| <b>Adherence to CBT sessions</b>                                                | 67% (range: 38% to 100%)                                                                                                                                                                                                                                                                                                                                                                                                                                                                                                                                                                      | Pert      | Individual studies from the meta-analysis published by Hawton et al. (2016)                                                            |
| <b>Unit cost for a 1-hour session of health professionals (public setting)</b>  | A\$115                                                                                                                                                                                                                                                                                                                                                                                                                                                                                                                                                                                        | N/A       | Weighted average unit cost for GP specialising mental health, Psychologist, Psychiatrist from MBS (Department of Human Services, 2020) |
| <b>Unit cost for a 1-hour session of health professionals (private setting)</b> | A\$260                                                                                                                                                                                                                                                                                                                                                                                                                                                                                                                                                                                        | N/A       | Australian Psychological Society (APS, 2020)                                                                                           |
| <b>Unit cost for a screening session with a nurse</b>                           | Wage rate for a nurse: A\$36.18 per hour (SE: 1.01)                                                                                                                                                                                                                                                                                                                                                                                                                                                                                                                                           | Lognormal | ABS (2016)                                                                                                                             |
| <b>Unit cost for a screening session with a GP</b>                              | A\$36.76 per session                                                                                                                                                                                                                                                                                                                                                                                                                                                                                                                                                                          | N/A       | Weighted average cost of MBS items 3, 23, 2712                                                                                         |
| <b>Psychologist supervision cost or training cost</b>                           | Wage rate for a psychologist: A\$38.04 per hour (SE: 2.40)                                                                                                                                                                                                                                                                                                                                                                                                                                                                                                                                    | Lognormal | ABS (2016)                                                                                                                             |
| <b>Population ratio for health professionals</b>                                | 415 per 100,000 population                                                                                                                                                                                                                                                                                                                                                                                                                                                                                                                                                                    | N/A       | ABS (2017a)                                                                                                                            |
| <b>Health expenditure for a suicide attempt</b>                                 | 15-19 years: M A\$8,066; F \$6,320<br>20-24 years: M A\$7,367; F \$5,825<br>25-29 years: M A\$8,106; F \$6,834<br>30-34 years: M A\$8,752; F \$8,122<br>35-39 years: M A\$8,749; F \$7,718<br>40-44 years: M A\$6,849; F \$6,020<br>45-49 years: M A\$7,504; F \$6,218<br>50-54 years: M A\$8,352; F \$7,065<br>55-59 years: M A\$12,248; F \$9,292<br>60-64 years: M A\$6,555; F \$4,780<br>65-69 years: M A\$10,145; F \$7,520<br>70-74 years: M A\$13,993; F \$11,176<br>75-79 years: M A\$17,249; F \$14,112<br>80-84 years: M A\$14,705; F \$9,966<br>85+ years: M A\$13,774; F \$15,364 | Lognormal | AIHW (2019)                                                                                                                            |
| <b>Cost associated with suicide</b>                                             | Male: 806,544<br>Female: 421,123                                                                                                                                                                                                                                                                                                                                                                                                                                                                                                                                                              | N/A       | KPMG report                                                                                                                            |
| <b>Unit cost uncertainty</b>                                                    | ±20%                                                                                                                                                                                                                                                                                                                                                                                                                                                                                                                                                                                          | Pert      | Expert opinion (Mihalopoulos et al., 2011; Vos et al., 2010)                                                                           |
| <b>Oncost<sup>a</sup></b>                                                       | 30%                                                                                                                                                                                                                                                                                                                                                                                                                                                                                                                                                                                           | N/A       | Expert opinion                                                                                                                         |

<sup>a</sup> Wage rates were adjusted to incorporate 30% on-costs - i.e., additional loadings to account for administration costs, leave, superannuation, etc.

## **Uncertainty and Sensitivity Analysis**

Uncertainty analyses were undertaken alongside each cost-effectiveness model to propagate parameter uncertainty (i.e., sampling error) from the input parameters to the final model outputs. Each uncertainty analysis was conducted using Monte Carlo simulation with 3,000 iterations. Estimates of incremental costs, QALYs, ROI ratios and ICERs were estimated with accompanying 95% uncertainty intervals (95% UI). Uncertainty iterations were represented on a cost-effectiveness plane. Uncertainty parameters are presented in Table E1.

We conducted sensitivity analyses (SA) to test the robustness of the model outputs to changes in the following input parameters/assumptions as explained above:

SA1: Referral is undertaken by GPs.

SA2: The intervention is delivered by a psychologist in a private setting with the cost of a psychologist consultation. The unit cost of A\$260 per 45- to 60-minute session was sourced from the 2019-2020 Recommended Schedule of the Australian Psychological Society (APS, 2020).

SA3: The intervention training costs for health professionals who delivered CBT were added. Based on the included trials evaluating CBT, health professionals may attend up to 36-hour training before delivering the intervention (Tapolaa et al., 2010). The number of health professionals required for this population sample were calculated based on the population rate of Medical Practitioners in Australia (415 per 100,000 population).

Table E2. *Scenario Analysis Results*

| Scenario analyses                                | 50% decay effect                   | 50% decay effect                    |
|--------------------------------------------------|------------------------------------|-------------------------------------|
|                                                  | ROI ratio (95% UI)                 | ICER (95% UI)                       |
|                                                  | <i>A\$ saving per A\$ invested</i> | <i>A\$ per QALY gained</i>          |
| Base case analysis                               | 6.0<br>(-29.6 to 61.2)             | Dominant<br>(Dominant to \$273,053) |
| SA1 – GP screening                               | 5.2<br>(-10.1 to 27.9)             | Dominant<br>(Dominant to \$270,600) |
| SA2 – Intervention delivery in a private setting | 2.5<br>(-4.8 to 13.3)              | Dominant<br>(Dominant to \$527,077) |
| SA3 – Accounting for training costs              | 5.1<br>(-9.8 to 27.8)              | Dominant<br>(Dominant to \$325,394) |

*Abbreviations: 95% UI - 95% uncertainty interval; A\$ - Australian dollars; QALY - Quality-adjusted life years; ICER - incremental cost-effectiveness ratio;*

**Ref.**

Australian Bureau of Statistics (ABS) (2016) 6306.0 Employee Earnings and Hours, Australia, June 2016. <http://www.abs.gov.au/ausstats/abs@.nsf/mf/6306.0/>

Australian Bureau of Statistics (2017a). 3101.0-Australian Demographic Statistic, Dec 2016. <http://www.abs.gov.au/ausstats/abs@.nsf/mf/3101.0/>

Australian Bureau of Statistics (2017b). 3303.0-Causes of Death, Australia, 2017. <https://www.abs.gov.au/ausstats/abs@.nsf/Lookup/by%20Subject/3303.0~2017~Main%20Features~Australia's%20leading%20causes%20of%20death,%202017~2>

Australian Institute of Health and Welfare (2019). *Health expenditure Australia 2017–2018*. Canberra: Australian Institute of Health and Welfare.

Australian Institute of Health and Welfare (AIHW) (2020). Suicide and self-harm monitoring. <https://www.aihw.gov.au/suicide-self-harm-monitoring>

- Australian Psychological Society (2020). *APS National Schedule of Recommended Fees and item numbers for psychological services*. Sydney: Australian Psychological Society.
- Carroll, R., Metcalfe, C., & Gunnell, D. (2014). Hospital presenting self-harm and risk of fatal and non-fatal repetition: systematic review and meta-analysis. *PloS one*, *9*(2), e89944. <https://doi.org/10.1371/journal.pone.0089944>
- Department of Human Services (2020). *Medicare benefits schedule item statistics*. Canberra: DHS.
- Hawton, K., Witt, K. G., Salisbury, T. L. T., Arensman, E., Gunnell, D., Hazell, P., ... & van Heeringen, K. (2016). Psychosocial interventions following self-harm in adults: a systematic review and meta-analysis. *The Lancet Psychiatry*, *3*(8), 740-750. [https://doi.org/10.1016/S2215-0366\(16\)30070-0](https://doi.org/10.1016/S2215-0366(16)30070-0)
- KPMG (2013). *The economic cost of suicide in Australia*. <https://menslink.org.au/wp-content/uploads/2013/10/KPMG-Economic-cost-of-suicide-in-Australia-Menslink.pdf>
- Mihalopoulos, C., Vos, T., Pirkis, J., & Carter, R. (2011). The economic analysis of prevention in mental health programs. *Annual Review of Clinical Psychology*, *7*, 169-201. <https://doi.org/10.1146/annurev-clinpsy-032210-104601>
- van Spijker, B. A., van Straten, A., Kerkhof, A. J., Hoeymans, N., & Smit, F. (2011). Disability weights for suicidal thoughts and non-fatal suicide attempts. *Journal of Affective Disorders*, *134*(1-3), 341-347. <https://doi.org/10.1016/j.jad.2011.05.020>
- Vos, T., Carter, R., Barendregt, J., Mihalopoulos, C., Veerman, J.L., Magnus, A., & ACE-Prevention Team (2010). *Assessing Cost-Effectiveness in Prevention (ACE-Prevention): Final Report*. Melbourne: University of Queensland, Brisbane and Deakin University.
